# Supplementary material for: Sub-wavelength waveguide properties of 1D and surface-functionalized SnO2 nanostructures of various morphologies
Source: publisher site journal article supplement (doi:10.3762/bjnano.10.37), 2019-02-07
Supplement: Additional file 1 [file 2190-4286-10-37-S1.pdf]

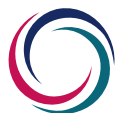

## Supporting Information

for

### **Sub-wavelength waveguide properties of 1D and surface-functionalized SnO<sub>2</sub> nanostructures of various morphologies**

Venkataramana Bonu, Binaya Kumar Sahu, Arindam Das,  
Sankarakumar Amirthapandian, Sandip Dhara and Harish C. Barshilia

*Beilstein J. Nanotechnol.* **2019**, *10*, 379–388. [doi:10.3762/bjnano.10.37](https://doi.org/10.3762/bjnano.10.37)

## Additional experimental results

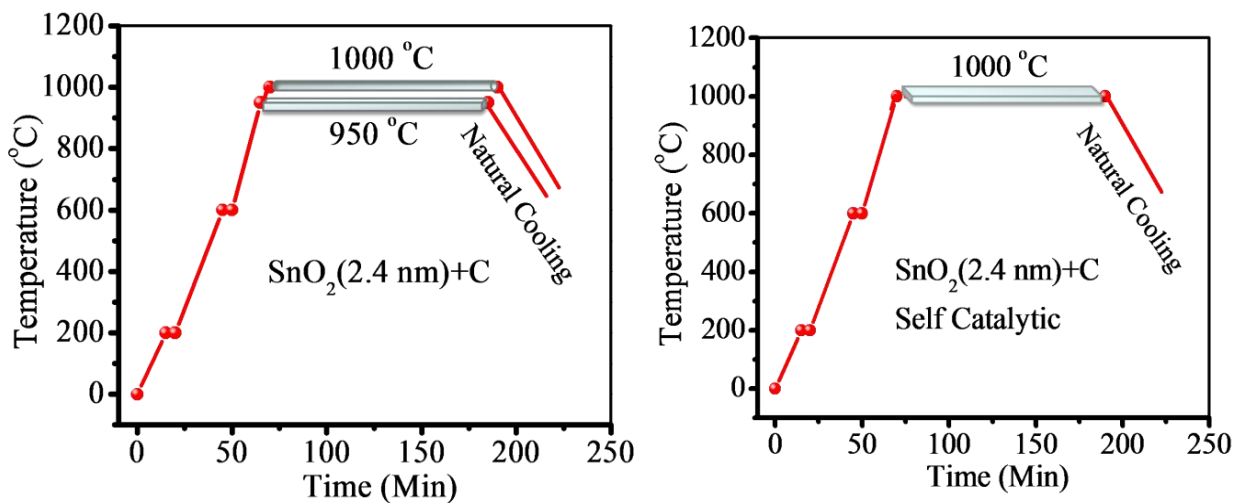

**Figure S1:** Temperature profile of the horizontal quartz tube furnace for (a) Catalytic VLS growth, (b) Non catalytic VS growth.

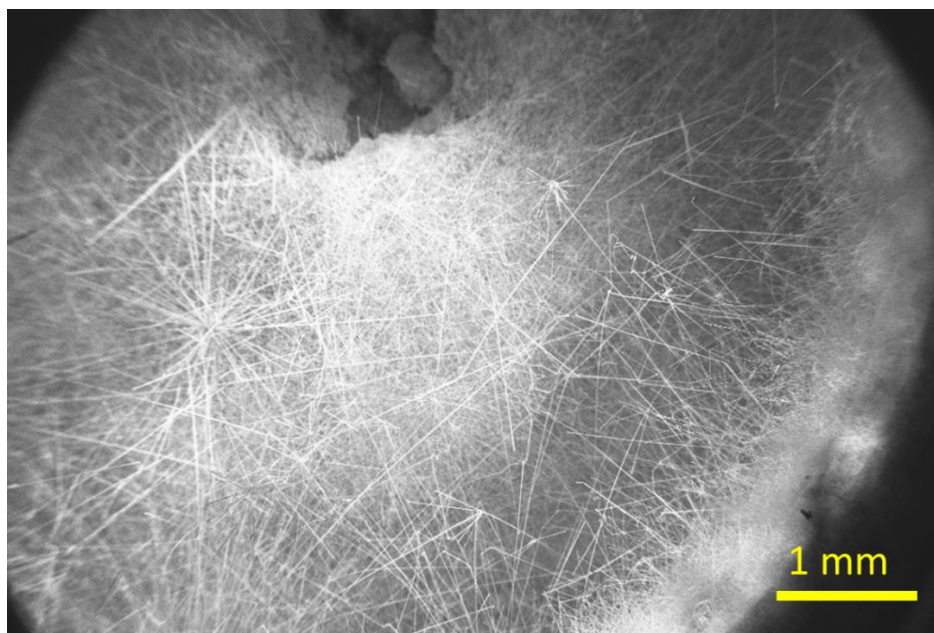

**Figure S2:** FESEM image of the nanobelts grown in the crucible.

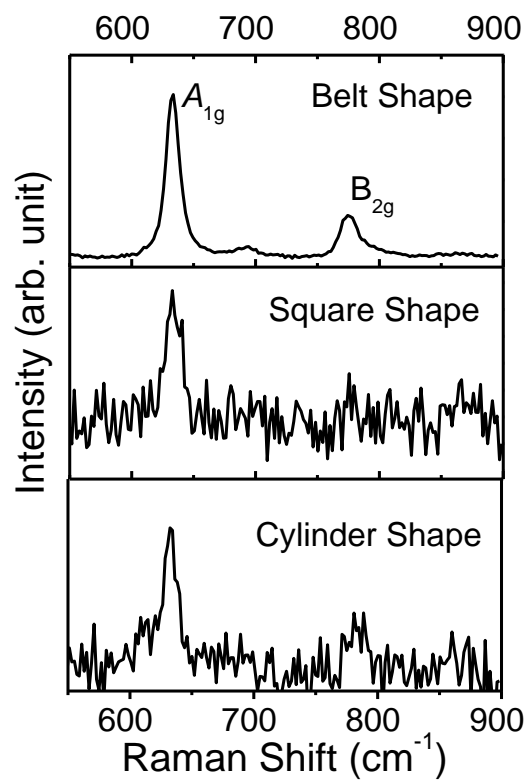

**Figure S3:** Raman spectra of the NWs.

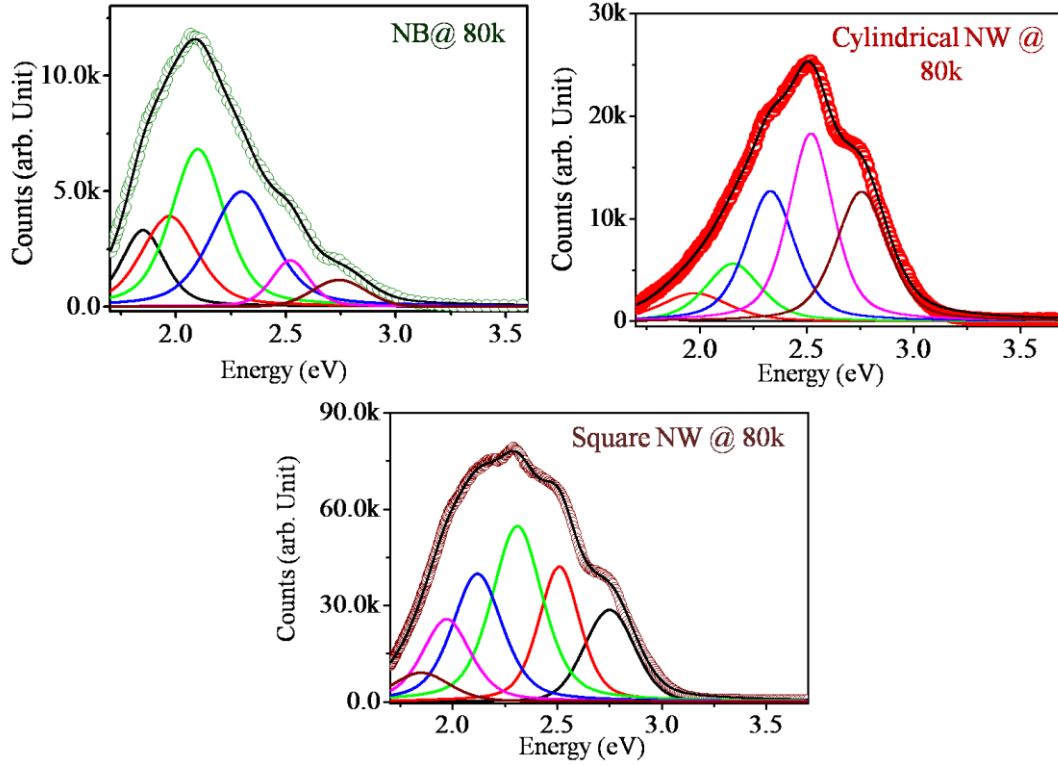

**Figure S4:** Gaussian fitting of the PL spectra @ 80K for (a) Belt, (b) Cylinder and (c) Square shaped NWs.

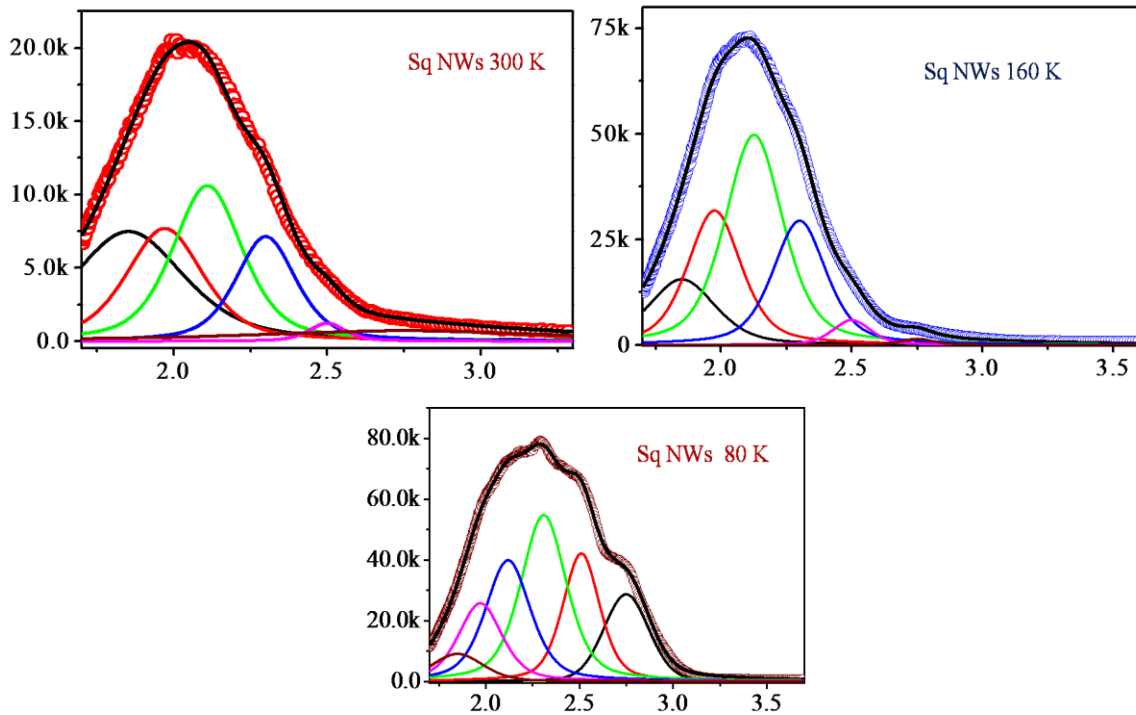

**Figure S5** Gaussian fitting of the PL spectra of square shape NWs at (a) 300K, (b) 160K and (c) 80K.
